# Supplementary material for: The 26S Proteasome Is Required for the Maintenance of Root Apical Meristem by Modulating Auxin and Cytokinin Responses Under High-Boron Stress
Source: Front Plant Sci. 2019 May 14;10:590. doi: 10.3389/fpls.2019.00590 (PMC6530338; doi:10.3389/fpls.2019.00590)
Supplement: FILE S1 — List of significantly enriched gene ontology terms. [file Table_1.XLSX]

## Sheet: Col_3mMB_up
Analysis Type:	PANTHER Overrepresentation Test (Released 20181113)
Annotation Version and Release Date:	GO Ontology database Released 2018-12-01
Analyzed List:	upload_1 (Arabidopsis thaliana)
Reference List:	Arabidopsis thaliana (all genes in database)
Test Type:	FISHER
Correction:	FDR
GO biological process complete	Arabidopsis thaliana - REFLIST (27581)	upload_1 (1372)	upload_1 (expected)	upload_1 (over/under)	upload_1 (fold Enrichment)	upload_1 (raw P-value)	upload_1 (FDR)
secondary metabolic process (GO:0019748)	371	66	18.46	+	3.58	7.15e-17	4.23e-13
nucleic acid metabolic process (GO:0090304)	1693	26	84.22	-	0.31	1.95e-13	5.76e-10
organelle organization (GO:0006996)	1593	27	79.24	-	0.34	1.49e-11	2.93e-08
response to stimulus (GO:0050896)	5704	389	283.74	+	1.37	5.03e-11	5.94e-08
secondary metabolite biosynthetic process (GO:0044550)	180	36	8.95	+	4.02	4.64e-11	6.85e-08
RNA metabolic process (GO:0016070)	1271	19	63.23	-	0.3	1.19e-10	1.17e-07
response to stress (GO:0006950)	3157	239	157.04	+	1.52	2.16e-10	1.82e-07
response to chemical (GO:0042221)	2755	211	137.05	+	1.54	1.43e-09	1.05e-06
phenylpropanoid biosynthetic process (GO:0009699)	116	26	5.77	+	4.51	2.88e-09	1.89e-06
phenylpropanoid metabolic process (GO:0009698)	141	28	7.01	+	3.99	7.37e-09	4.35e-06
response to biotic stimulus (GO:0009607)	1002	95	49.84	+	1.91	1.64e-08	6.93e-06
response to drug (GO:0042493)	593	66	29.5	+	2.24	1.31e-08	7.05e-06
response to other organism (GO:0051707)	1001	95	49.79	+	1.91	1.61e-08	7.33e-06
response to external biotic stimulus (GO:0043207)	1001	95	49.79	+	1.91	1.61e-08	7.94e-06
response to oxygen-containing compound (GO:1901700)	1577	132	78.45	+	1.68	2.76e-08	1.09e-05
RNA processing (GO:0006396)	723	8	35.97	-	0.22	4.83e-08	1.79e-05
nucleobase-containing compound metabolic process (GO:0006139)	2122	55	105.56	-	0.52	5.69e-08	1.98e-05
suberin biosynthetic process (GO:0010345)	20	11	0.99	+	11.06	9.16e-08	3.01e-05
macromolecule metabolic process (GO:0043170)	4972	173	247.33	-	0.7	1.19e-07	3.7e-05
gene expression (GO:0010467)	1512	34	75.21	-	0.45	1.42e-07	3.81e-05
response to external stimulus (GO:0009605)	1390	117	69.14	+	1.69	1.38e-07	3.9e-05
response to toxic substance (GO:0009636)	208	32	10.35	+	3.09	1.36e-07	4.02e-05
defense response to other organism (GO:0098542)	696	70	34.62	+	2.02	1.62e-07	4.15e-05
multi-organism process (GO:0051704)	1490	121	74.12	+	1.63	4.75e-07	0.000117
cellular component organization or biogenesis (GO:0071840)	2830	88	140.78	-	0.63	1.3e-06	0.000307
defense response (GO:0006952)	1169	98	58.15	+	1.69	1.88e-06	0.000428
sulfur compound metabolic process (GO:0006790)	379	43	18.85	+	2.28	2.54e-06	0.000557
toxin metabolic process (GO:0009404)	71	16	3.53	+	4.53	2.91e-06	0.000615
response to organic substance (GO:0010033)	1908	143	94.91	+	1.51	3.21e-06	0.000654
defense response to bacterium (GO:0042742)	392	44	19.5	+	2.26	3.35e-06	0.000661
response to abiotic stimulus (GO:0009628)	2069	152	102.92	+	1.48	4.39e-06	0.000837
toxin catabolic process (GO:0009407)	49	13	2.44	+	5.33	5.44e-06	0.00101
response to acid chemical (GO:0001101)	1162	95	57.8	+	1.64	6.76e-06	0.00121
detoxification (GO:0098754)	97	18	4.83	+	3.73	7.81e-06	0.00136
lipid localization (GO:0010876)	208	28	10.35	+	2.71	8.07e-06	0.00136
ion transport (GO:0006811)	666	62	33.13	+	1.87	8.4e-06	0.00138
response to oomycetes (GO:0002239)	89	17	4.43	+	3.84	9.94e-06	0.00159
intracellular transport (GO:0046907)	678	11	33.73	-	0.33	1.11e-05	0.00169
oxidation-reduction process (GO:0055114)	935	80	46.51	+	1.72	1.09e-05	0.0017
defense response to fungus (GO:0050832)	249	31	12.39	+	2.5	1.24e-05	0.00183
glycosinolate metabolic process (GO:0019757)	136	21	6.77	+	3.1	1.76e-05	0.00221
response to fungus (GO:0009620)	327	37	16.27	+	2.27	1.54e-05	0.00223
establishment of localization in cell (GO:0051649)	732	13	36.41	-	0.36	1.59e-05	0.00224
lipid transport (GO:0006869)	181	25	9	+	2.78	1.64e-05	0.00225
glucosinolate metabolic process (GO:0019760)	136	21	6.77	+	3.1	1.76e-05	0.00226
response to osmotic stress (GO:0006970)	662	61	32.93	+	1.85	1.68e-05	0.00226
S-glycoside metabolic process (GO:0016143)	136	21	6.77	+	3.1	1.76e-05	0.00231
protein transport (GO:0015031)	695	12	34.57	-	0.35	2.1e-05	0.00259
glutathione metabolic process (GO:0006749)	57	13	2.84	+	4.58	2.19e-05	0.00264
RNA modification (GO:0009451)	364	3	18.11	-	0.17	3.44e-05	0.00407
response to temperature stimulus (GO:0009266)	611	56	30.39	+	1.84	4.1e-05	0.00475
response to salt stress (GO:0009651)	587	54	29.2	+	1.85	4.53e-05	0.00515
establishment of protein localization (GO:0045184)	703	13	34.97	-	0.37	5.16e-05	0.00576
intracellular protein transport (GO:0006886)	559	9	27.81	-	0.32	8.37e-05	0.00884
protein localization (GO:0008104)	774	16	38.5	-	0.42	8.28e-05	0.0089
response to bacterium (GO:0009617)	492	47	24.47	+	1.92	8.17e-05	0.00894
vesicle-mediated transport (GO:0016192)	451	6	22.43	-	0.27	8.84e-05	0.00917
response to wounding (GO:0009611)	215	26	10.7	+	2.43	9.32e-05	0.0095
response to hormone (GO:0009725)	1593	116	79.24	+	1.46	0.000101	0.0101
response to host (GO:0075136)	12	6	0.6	+	10.05	0.000127	0.0103
modulation by symbiont of host defense response (GO:0052031)	12	6	0.6	+	10.05	0.000127	0.0104
response to defenses of other organism involved in symbiotic interaction (GO:0052173)	12	6	0.6	+	10.05	0.000127	0.0106
response to host defenses (GO:0052200)	12	6	0.6	+	10.05	0.000127	0.0107
modulation by organism of defense response of other organism involved in symbiotic interaction (GO:0052255)	12	6	0.6	+	10.05	0.000127	0.0109
response to inorganic substance (GO:0010035)	933	75	46.41	+	1.62	0.000111	0.011
modulation by organism of immune response of other organism involved in symbiotic interaction (GO:0052552)	12	6	0.6	+	10.05	0.000127	0.011
response to endogenous stimulus (GO:0009719)	1609	116	80.04	+	1.45	0.000139	0.0111
cellular respiration (GO:0045333)	122	18	6.07	+	2.97	0.000115	0.0111
modulation by symbiont of host immune response (GO:0052553)	12	6	0.6	+	10.05	0.000127	0.0112
response to water (GO:0009415)	351	36	17.46	+	2.06	0.000144	0.0112
response to cold (GO:0009409)	423	41	21.04	+	1.95	0.000147	0.0113
chromosome organization (GO:0051276)	509	8	25.32	-	0.32	0.000144	0.0114
positive regulation by organism of immune response of other organism involved in symbiotic interaction (GO:0052555)	12	6	0.6	+	10.05	0.000127	0.0114
cellular macromolecule metabolic process (GO:0044260)	3828	142	190.42	-	0.75	0.000153	0.0115
response to chitin (GO:0010200)	137	19	6.81	+	2.79	0.000155	0.0115
heterocycle metabolic process (GO:0046483)	2431	82	120.93	-	0.68	0.000152	0.0115
positive regulation by symbiont of host immune response (GO:0052556)	12	6	0.6	+	10.05	0.000127	0.0116
defense response to oomycetes (GO:0002229)	69	13	3.43	+	3.79	0.000121	0.0116
inorganic anion transport (GO:0015698)	103	16	5.12	+	3.12	0.00016	0.0116
response to immune response of other organism involved in symbiotic interaction (GO:0052564)	12	6	0.6	+	10.05	0.000127	0.0117
response to host immune response (GO:0052572)	12	6	0.6	+	10.05	0.000127	0.0119
cation transport (GO:0006812)	382	38	19	+	2	0.000169	0.0122
aromatic compound biosynthetic process (GO:0019438)	807	66	40.14	+	1.64	0.000186	0.0132
response to water deprivation (GO:0009414)	344	35	17.11	+	2.05	0.000203	0.0143
glycosyl compound metabolic process (GO:1901657)	202	24	10.05	+	2.39	0.000216	0.0145
Unclassified (UNCLASSIFIED)	6312	256	313.99	-	0.82	0.000214	0.0146
ncRNA metabolic process (GO:0034660)	400	5	19.9	-	0.25	0.00021	0.0146
biological_process (GO:0008150)	21269	1116	1058.01	+	1.05	0.000214	0.0147
transmembrane transport (GO:0055085)	702	59	34.92	+	1.69	0.000252	0.0167
cellular protein localization (GO:0034613)	643	13	31.99	-	0.41	0.000264	0.0173
Golgi vesicle transport (GO:0048193)	179	0	8.9	-	< 0.01	0.000287	0.0186
pathogen-associated molecular pattern dependent induction by symbiont of host innate immune response (GO:0052033)	9	5	0.45	+	11.17	0.000332	0.0192
cellular component organization (GO:0016043)	2472	85	122.97	-	0.69	0.0003	0.0193
positive regulation by symbiont of host innate immune response (GO:0052166)	9	5	0.45	+	11.17	0.000332	0.0194
response to insect (GO:0009625)	30	8	1.49	+	5.36	0.000341	0.0196
modulation by symbiont of host innate immune response (GO:0052167)	9	5	0.45	+	11.17	0.000332	0.0196
response to hydrogen peroxide (GO:0042542)	78	13	3.88	+	3.35	0.000352	0.0196
cellular localization (GO:0051641)	894	22	44.47	-	0.49	0.000347	0.0197
pathogen-associated molecular pattern dependent modulation by symbiont of host innate immune response (GO:0052169)	9	5	0.45	+	11.17	0.000332	0.0198
energy derivation by oxidation of organic compounds (GO:0015980)	135	18	6.72	+	2.68	0.000352	0.0198
pathogen-associated molecular pattern dependent induction by organism of innate immune response of other organism involved in symbiotic interaction (GO:0052257)	9	5	0.45	+	11.17	0.000332	0.02
positive regulation by organism of innate immune response in other organism involved in symbiotic interaction (GO:0052305)	9	5	0.45	+	11.17	0.000332	0.0202
modulation by organism of innate immune response in other organism involved in symbiotic interaction (GO:0052306)	9	5	0.45	+	11.17	0.000332	0.0204
pathogen-associated molecular pattern dependent modulation by organism of innate immune response in other organism involved in symbiotic interaction (GO:0052308)	9	5	0.45	+	11.17	0.000332	0.0206
purine nucleoside triphosphate metabolic process (GO:0009144)	148	19	7.36	+	2.58	0.000375	0.0207
positive regulation by symbiont of host defense response (GO:0052509)	9	5	0.45	+	11.17	0.000332	0.0208
positive regulation by organism of defense response of other organism involved in symbiotic interaction (GO:0052510)	9	5	0.45	+	11.17	0.000332	0.0211
regulation of nucleic acid-templated transcription (GO:1903506)	2085	141	103.72	+	1.36	0.000402	0.0214
regulation of RNA biosynthetic process (GO:2001141)	2085	141	103.72	+	1.36	0.000402	0.0216
indole-containing compound metabolic process (GO:0042430)	90	14	4.48	+	3.13	0.000396	0.0217
regulation of transcription, DNA-templated (GO:0006355)	2084	141	103.67	+	1.36	0.000401	0.0217
proton transmembrane transport (GO:1902600)	69	12	3.43	+	3.5	0.000418	0.0221
ATP metabolic process (GO:0046034)	139	18	6.91	+	2.6	0.000482	0.0252
hormone metabolic process (GO:0042445)	253	27	12.59	+	2.15	0.000532	0.0276
hormone biosynthetic process (GO:0042446)	177	21	8.8	+	2.39	0.000558	0.0287
monovalent inorganic cation transport (GO:0015672)	163	20	8.11	+	2.47	0.000587	0.0299
cellular macromolecule biosynthetic process (GO:0034645)	1212	35	60.29	-	0.58	0.000626	0.0316
amide transport (GO:0042886)	781	19	38.85	-	0.49	0.000695	0.0348
cutin biosynthetic process (GO:0010143)	18	6	0.9	+	6.7	0.000721	0.0358
response to oxidative stress (GO:0006979)	417	38	20.74	+	1.83	0.000754	0.0371
indole glucosinolate metabolic process (GO:0042343)	35	8	1.74	+	4.59	0.000821	0.0401
cellular nitrogen compound metabolic process (GO:0034641)	2952	109	146.85	-	0.74	0.000865	0.0419
ncRNA processing (GO:0034470)	323	4	16.07	-	0.25	0.000908	0.0437
regulation of hormone levels (GO:0010817)	405	37	20.15	+	1.84	0.000932	0.0444
purine ribonucleotide metabolic process (GO:0009150)	212	23	10.55	+	2.18	0.000982	0.0461
macromolecule methylation (GO:0043414)	158	0	7.86	-	< 0.01	0.000977	0.0462
nucleoside triphosphate metabolic process (GO:0009141)	159	19	7.91	+	2.4	0.000999	0.0465
drug metabolic process (GO:0017144)	531	45	26.41	+	1.7	0.00102	0.0467
response to antibiotic (GO:0046677)	305	30	15.17	+	1.98	0.00101	0.0468
defense response to fungus, incompatible interaction (GO:0009817)	46	9	2.29	+	3.93	0.00104	0.0473
regulation of RNA metabolic process (GO:0051252)	2158	142	107.35	+	1.32	0.00105	0.0474
purine ribonucleoside triphosphate metabolic process (GO:0009205)	144	18	7.16	+	2.51	0.00108	0.0478
ribosome biogenesis (GO:0042254)	383	6	19.05	-	0.31	0.00107	0.0479
peptide transport (GO:0015833)	764	19	38	-	0.5	0.00113	0.0493
fatty acid derivative metabolic process (GO:1901568)	37	8	1.84	+	4.35	0.00112	0.0495

## Sheet: Col_3mMB_down
Analysis Type:	PANTHER Overrepresentation Test (Released 20181113)
Annotation Version and Release Date:	GO Ontology database Released 2018-12-01
Analyzed List:	upload_1 (Arabidopsis thaliana)
Reference List:	Arabidopsis thaliana (all genes in database)
Test Type:	FISHER
Correction:	FDR
GO biological process complete	Arabidopsis thaliana - REFLIST (27581)	upload_1 (344)	upload_1 (expected)	upload_1 (over/under)	upload_1 (fold Enrichment)	upload_1 (raw P-value)	upload_1 (FDR)
response to chemical (GO:0042221)	2755	65	34.36	+	1.89	7.96e-07	0.00235
cellular metal ion homeostasis (GO:0006875)	128	11	1.6	+	6.89	1.3e-06	0.00256
cellular transition metal ion homeostasis (GO:0046916)	63	8	0.79	+	10.18	2.65e-06	0.00261
cellular iron ion homeostasis (GO:0006879)	42	7	0.52	+	13.36	2.23e-06	0.00264
cellular ion homeostasis (GO:0006873)	173	12	2.16	+	5.56	3.5e-06	0.00296
iron ion homeostasis (GO:0055072)	61	8	0.76	+	10.52	2.13e-06	0.00314
transition metal ion transport (GO:0000041)	92	9	1.15	+	7.84	4.54e-06	0.00336
metal ion homeostasis (GO:0055065)	176	13	2.2	+	5.92	7.1e-07	0.00419
transition metal ion homeostasis (GO:0055076)	97	9	1.21	+	7.44	6.77e-06	0.00445
response to iron ion (GO:0010039)	52	7	0.65	+	10.79	7.97e-06	0.00471
cellular response to iron ion (GO:0071281)	34	6	0.42	+	14.15	9.02e-06	0.00485
cellular cation homeostasis (GO:0030003)	163	11	2.03	+	5.41	1.14e-05	0.00561
response to hormone (GO:0009725)	1593	41	19.87	+	2.06	1.45e-05	0.00572
cation homeostasis (GO:0055080)	235	13	2.93	+	4.44	1.4e-05	0.00593
cellular chemical homeostasis (GO:0055082)	199	12	2.48	+	4.83	1.34e-05	0.00608
ion homeostasis (GO:0050801)	280	14	3.49	+	4.01	1.94e-05	0.00717
inorganic ion homeostasis (GO:0098771)	248	13	3.09	+	4.2	2.4e-05	0.0079
response to endogenous stimulus (GO:0009719)	1609	41	20.07	+	2.04	2.4e-05	0.00836
macromolecule metabolic process (GO:0043170)	4972	34	62.01	-	0.55	3.74e-05	0.011
cellular response to inorganic substance (GO:0071241)	67	7	0.84	+	8.38	3.59e-05	0.0112
cellular homeostasis (GO:0019725)	305	14	3.8	+	3.68	4.74e-05	0.0133
response to stimulus (GO:0050896)	5704	103	71.14	+	1.45	5.59e-05	0.015
response to inorganic substance (GO:0010035)	933	27	11.64	+	2.32	7.2e-05	0.0185
cellular response to reactive nitrogen species (GO:1902170)	31	5	0.39	+	12.93	7.59e-05	0.0187
cellular response to metal ion (GO:0071248)	53	6	0.66	+	9.08	8.7e-05	0.0206
iron ion transport (GO:0006826)	33	5	0.41	+	12.15	9.9e-05	0.0217
cellular response to ethylene stimulus (GO:0071369)	108	8	1.35	+	5.94	9.79e-05	0.0223
coumarin metabolic process (GO:0009804)	6	3	0.07	+	40.09	0.000147	0.0311
nitrogen compound metabolic process (GO:0006807)	5829	45	72.7	-	0.62	0.00018	0.0368
chemical homeostasis (GO:0048878)	396	15	4.94	+	3.04	0.0002	0.0381
cellular response to nitric oxide (GO:0071732)	20	4	0.25	+	16.04	0.000198	0.039
response to bronchodilator (GO:0097366)	21	4	0.26	+	15.27	0.000233	0.0406
cellular protein metabolic process (GO:0044267)	2854	16	35.6	-	0.45	0.000224	0.0413
response to nitric oxide (GO:0071731)	21	4	0.26	+	15.27	0.000233	0.0418
response to organic substance (GO:0010033)	1908	43	23.8	+	1.81	0.000248	0.0419
gene expression (GO:0010467)	1512	5	18.86	-	0.27	0.000273	0.0448
primary metabolic process (GO:0044238)	6666	55	83.14	-	0.66	0.000286	0.0456

## Sheet: rpt5a_3mMB_up
Analysis Type:	PANTHER Overrepresentation Test (Released 20181113)
Annotation Version and Release Date:	GO Ontology database Released 2018-12-01
Analyzed List:	upload_1 (Arabidopsis thaliana)
Reference List:	Arabidopsis thaliana (all genes in database)
Test Type:	FISHER
Correction:	FDR
GO biological process complete	Arabidopsis thaliana - REFLIST (27581)	upload_1 (3028)	upload_1 (expected)	upload_1 (over/under)	upload_1 (fold Enrichment)	upload_1 (raw P-value)	upload_1 (FDR)
primary metabolic process (GO:0044238)	6666	512	731.83	-	0.7	2.96e-20	1.75e-16
cellular component organization or biogenesis (GO:0071840)	2830	165	310.69	-	0.53	1.58e-19	3.11e-16
macromolecule metabolic process (GO:0043170)	4972	355	545.85	-	0.65	1.52e-19	4.49e-16
organelle organization (GO:0006996)	1593	69	174.89	-	0.39	5.03e-19	7.43e-16
nitrogen compound metabolic process (GO:0006807)	5829	457	639.94	-	0.71	8.23e-16	9.73e-13
nucleic acid metabolic process (GO:0090304)	1693	86	185.87	-	0.46	1.31e-15	1.29e-12
cellular component organization (GO:0016043)	2472	155	271.39	-	0.57	2.6e-14	2.19e-11
nucleobase-containing compound metabolic process (GO:0006139)	2122	126	232.97	-	0.54	4.08e-14	2.68e-11
organic substance metabolic process (GO:0071704)	7379	621	810.11	-	0.77	3.66e-14	2.71e-11
cellular nitrogen compound metabolic process (GO:0034641)	2952	200	324.09	-	0.62	1.4e-13	8.29e-11
RNA metabolic process (GO:0016070)	1271	61	139.54	-	0.44	4.62e-13	2.48e-10
gene expression (GO:0010467)	1512	81	166	-	0.49	1.13e-12	5.59e-10
cellular component biogenesis (GO:0044085)	1164	55	127.79	-	0.43	2.42e-12	1.1e-09
response to chemical (GO:0042221)	2755	431	302.46	+	1.42	3.67e-12	1.55e-09
regulation of nucleic acid-templated transcription (GO:1903506)	2085	338	228.9	+	1.48	2.88e-11	8.95e-09
cellular metabolic process (GO:0044237)	7115	616	781.13	-	0.79	2.34e-11	9.22e-09
macromolecule modification (GO:0043412)	2338	156	256.68	-	0.61	2.52e-11	9.29e-09
regulation of RNA biosynthetic process (GO:2001141)	2085	338	228.9	+	1.48	2.88e-11	9.45e-09
regulation of transcription, DNA-templated (GO:0006355)	2084	338	228.79	+	1.48	2.83e-11	9.85e-09
heterocycle metabolic process (GO:0046483)	2431	165	266.89	-	0.62	3.6e-11	1.06e-08
cellular macromolecule metabolic process (GO:0044260)	3828	294	420.26	-	0.7	4.01e-11	1.13e-08
metabolic process (GO:0008152)	8200	730	900.24	-	0.81	5.53e-11	1.49e-08
RNA processing (GO:0006396)	723	27	79.38	-	0.34	7.35e-11	1.89e-08
protein localization (GO:0008104)	774	32	84.97	-	0.38	2.44e-10	6e-08
response to stimulus (GO:0050896)	5704	779	626.22	+	1.24	2.78e-10	6.32e-08
regulation of cellular biosynthetic process (GO:0031326)	2346	366	257.56	+	1.42	2.68e-10	6.33e-08
cellular aromatic compound metabolic process (GO:0006725)	2578	183	283.03	-	0.65	2.99e-10	6.55e-08
chromosome organization (GO:0051276)	509	15	55.88	-	0.27	5.43e-10	1.07e-07
regulation of cellular macromolecule biosynthetic process (GO:2000112)	2246	351	246.58	+	1.42	5.63e-10	1.07e-07
regulation of macromolecule biosynthetic process (GO:0010556)	2255	352	247.57	+	1.42	6.02e-10	1.08e-07
regulation of RNA metabolic process (GO:0051252)	2158	340	236.92	+	1.44	5.35e-10	1.09e-07
regulation of biosynthetic process (GO:0009889)	2370	367	260.19	+	1.41	6.01e-10	1.11e-07
cellular macromolecule biosynthetic process (GO:0034645)	1212	66	133.06	-	0.5	5.26e-10	1.11e-07
response to drug (GO:0042493)	593	124	65.1	+	1.9	8.11e-10	1.41e-07
vesicle-mediated transport (GO:0016192)	451	12	49.51	-	0.24	1.37e-09	2.31e-07
organic cyclic compound metabolic process (GO:1901360)	2691	197	295.43	-	0.67	1.53e-09	2.52e-07
cellular macromolecule localization (GO:0070727)	675	27	74.11	-	0.36	1.88e-09	2.93e-07
establishment of protein localization (GO:0045184)	703	29	77.18	-	0.38	1.87e-09	2.98e-07
cellular localization (GO:0051641)	894	43	98.15	-	0.44	2.07e-09	3.13e-07
response to oxygen-containing compound (GO:1901700)	1577	259	173.13	+	1.5	2.76e-09	4.08e-07
cellular process (GO:0009987)	10241	960	1124.32	-	0.85	3.1e-09	4.46e-07
protein transport (GO:0015031)	695	29	76.3	-	0.38	3.32e-09	4.68e-07
ncRNA metabolic process (GO:0034660)	400	10	43.91	-	0.23	5.11e-09	7.02e-07
regulation of nucleobase-containing compound metabolic process (GO:0019219)	2248	345	246.8	+	1.4	5.7e-09	7.65e-07
proteasomal ubiquitin-independent protein catabolic process (GO:0010499)	25	19	2.74	+	6.92	9.46e-09	1.24e-06
response to organic substance (GO:0010033)	1908	299	209.47	+	1.43	1.09e-08	1.4e-06
protein metabolic process (GO:0019538)	3177	248	348.79	-	0.71	1.27e-08	1.6e-06
cellular protein localization (GO:0034613)	643	27	70.59	-	0.38	1.4e-08	1.72e-06
macromolecule biosynthetic process (GO:0009059)	1251	75	137.34	-	0.55	1.9e-08	2.29e-06
ribosome biogenesis (GO:0042254)	383	10	42.05	-	0.24	1.96e-08	2.31e-06
intracellular transport (GO:0046907)	678	31	74.43	-	0.42	5.06e-08	5.86e-06
regulation of gene expression (GO:0010468)	2474	365	271.61	+	1.34	8.47e-08	9.63e-06
ribonucleoprotein complex biogenesis (GO:0022613)	466	17	51.16	-	0.33	1.33e-07	1.48e-05
cofactor biosynthetic process (GO:0051188)	252	4	27.67	-	0.14	1.38e-07	1.51e-05
response to hormone (GO:0009725)	1593	250	174.89	+	1.43	1.92e-07	2.07e-05
response to acid chemical (GO:0001101)	1162	193	127.57	+	1.51	2.14e-07	2.25e-05
response to endogenous stimulus (GO:0009719)	1609	251	176.65	+	1.42	2.71e-07	2.81e-05
regulation of nitrogen compound metabolic process (GO:0051171)	2654	383	291.37	+	1.31	2.89e-07	2.95e-05
RNA modification (GO:0009451)	364	11	39.96	-	0.28	3.11e-07	3.12e-05
establishment of localization in cell (GO:0051649)	732	38	80.36	-	0.47	4.67e-07	4.6e-05
cellular protein metabolic process (GO:0044267)	2854	228	313.33	-	0.73	4.8e-07	4.65e-05
chromatin organization (GO:0006325)	343	10	37.66	-	0.27	5.52e-07	5.18e-05
intracellular protein transport (GO:0006886)	559	25	61.37	-	0.41	5.52e-07	5.26e-05
organonitrogen compound biosynthetic process (GO:1901566)	1376	92	151.07	-	0.61	6.04e-07	5.58e-05
ncRNA processing (GO:0034470)	323	9	35.46	-	0.25	6.56e-07	5.97e-05
regulation of cellular metabolic process (GO:0031323)	2830	401	310.69	+	1.29	8.28e-07	7.42e-05
regulation of primary metabolic process (GO:0080090)	2721	387	298.73	+	1.3	1.02e-06	8.72e-05
cellular protein modification process (GO:0006464)	1927	143	211.56	-	0.68	1.01e-06	8.76e-05
protein modification process (GO:0036211)	1927	143	211.56	-	0.68	1.01e-06	8.89e-05
cellular biosynthetic process (GO:0044249)	2567	203	281.82	-	0.72	1.06e-06	8.97e-05
amide transport (GO:0042886)	781	43	85.74	-	0.5	1.09e-06	9.03e-05
response to stress (GO:0006950)	3157	439	346.59	+	1.27	1.42e-06	0.000117
peptide transport (GO:0015833)	764	42	83.88	-	0.5	1.51e-06	0.000122
organonitrogen compound metabolic process (GO:1901564)	4285	373	470.43	-	0.79	1.8e-06	0.000144
response to inorganic substance (GO:0010035)	933	156	102.43	+	1.52	2.33e-06	0.000184
covalent chromatin modification (GO:0016569)	167	2	18.33	-	0.11	7.09e-06	0.000551
response to antibiotic (GO:0046677)	305	64	33.48	+	1.91	9.23e-06	0.000709
histone modification (GO:0016570)	162	2	17.79	-	0.11	1.03e-05	0.000784
macromolecule localization (GO:0033036)	1030	68	113.08	-	0.6	1.14e-05	0.000853
regulation of macromolecule metabolic process (GO:0060255)	2832	391	310.91	+	1.26	1.23e-05	0.000911
organic substance biosynthetic process (GO:1901576)	2689	223	295.21	-	0.76	1.39e-05	0.00102
biosynthetic process (GO:0009058)	2808	235	308.28	-	0.76	1.53e-05	0.00111
response to ethylene (GO:0009723)	215	49	23.6	+	2.08	1.64e-05	0.00117
coenzyme biosynthetic process (GO:0009108)	193	4	21.19	-	0.19	2.1e-05	0.00148
response to salicylic acid (GO:0009751)	201	46	22.07	+	2.08	2.42e-05	0.00168
regulation of metabolic process (GO:0019222)	3080	418	338.14	+	1.24	2.48e-05	0.0017
response to water (GO:0009415)	351	68	38.53	+	1.76	4.72e-05	0.0032
amide biosynthetic process (GO:0043604)	617	36	67.74	-	0.53	6.49e-05	0.00436
nitrogen compound transport (GO:0071705)	968	66	106.27	-	0.62	6.69e-05	0.00444
Unclassified (UNCLASSIFIED)	6312	598	692.97	-	0.86	7.43e-05	0.00472
response to nitrogen compound (GO:1901698)	297	59	32.61	+	1.81	7.58e-05	0.00477
biological_process (GO:0008150)	21269	2430	2335.03	+	1.04	7.43e-05	0.00477
cell wall biogenesis (GO:0042546)	195	5	21.41	-	0.23	7.32e-05	0.00481
cellular nitrogen compound biosynthetic process (GO:0044271)	1263	93	138.66	-	0.67	7.41e-05	0.00481
response to water deprivation (GO:0009414)	344	66	37.77	+	1.75	7.99e-05	0.00497
glycoprotein metabolic process (GO:0009100)	118	1	12.95	-	0.08	8.83e-05	0.00544
rRNA metabolic process (GO:0016072)	226	7	24.81	-	0.28	9.44e-05	0.00575
cytokinesis (GO:0000910)	97	0	10.65	-	< 0.01	9.72e-05	0.00586
tRNA metabolic process (GO:0006399)	160	3	17.57	-	0.17	9.86e-05	0.00588
plastid organization (GO:0009657)	282	11	30.96	-	0.36	0.000111	0.00656
polysaccharide biosynthetic process (GO:0000271)	175	4	19.21	-	0.21	0.000125	0.00732
secondary metabolic process (GO:0019748)	371	69	40.73	+	1.69	0.00014	0.00812
cellular component assembly (GO:0022607)	690	44	75.75	-	0.58	0.000167	0.00959
peptidyl-amino acid modification (GO:0018193)	302	13	33.16	-	0.39	0.000194	0.0107
response to biotic stimulus (GO:0009607)	1002	153	110.01	+	1.39	0.000194	0.0108
response to other organism (GO:0051707)	1001	153	109.9	+	1.39	0.000192	0.0108
response to external biotic stimulus (GO:0043207)	1001	153	109.9	+	1.39	0.000192	0.0109
response to abiotic stimulus (GO:0009628)	2069	286	227.15	+	1.26	0.000212	0.0113
DNA metabolic process (GO:0006259)	494	28	54.23	-	0.52	0.000207	0.0113
positive regulation of nucleic acid-templated transcription (GO:1903508)	485	84	53.25	+	1.58	0.000212	0.0114
positive regulation of RNA biosynthetic process (GO:1902680)	485	84	53.25	+	1.58	0.000212	0.0115
cell cycle process (GO:0022402)	356	17	39.08	-	0.43	0.000222	0.0117
cellular response to reactive nitrogen species (GO:1902170)	31	13	3.4	+	3.82	0.000231	0.0121
biological regulation (GO:0065007)	5666	710	622.05	+	1.14	0.000234	0.0121
rRNA processing (GO:0006364)	214	7	23.49	-	0.3	0.000247	0.0127
translation (GO:0006412)	554	33	60.82	-	0.54	0.000265	0.0135
positive regulation of transcription, DNA-templated (GO:0045893)	483	83	53.03	+	1.57	0.000274	0.0138
Golgi vesicle transport (GO:0048193)	179	5	19.65	-	0.25	0.00028	0.014
glycoprotein biosynthetic process (GO:0009101)	106	1	11.64	-	0.09	0.000283	0.0141
glycosylation (GO:0070085)	108	1	11.86	-	0.08	0.000288	0.0142
regulation of biological process (GO:0050789)	4978	629	546.51	+	1.15	0.000301	0.0146
response to organic cyclic compound (GO:0014070)	328	61	36.01	+	1.69	0.000304	0.0146
plant-type cell wall modification (GO:0009827)	57	18	6.26	+	2.88	0.000299	0.0146
cell cycle (GO:0007049)	486	28	53.36	-	0.52	0.000329	0.0157
cellular polysaccharide biosynthetic process (GO:0033692)	162	4	17.79	-	0.22	0.000347	0.0164
secondary metabolite biosynthetic process (GO:0044550)	180	39	19.76	+	1.97	0.000357	0.0167
peptide biosynthetic process (GO:0043043)	559	34	61.37	-	0.55	0.000372	0.0173
detoxification (GO:0098754)	97	25	10.65	+	2.35	0.000376	0.0173
response to chitin (GO:0010200)	137	32	15.04	+	2.13	0.000382	0.0175
positive regulation of cellular biosynthetic process (GO:0031328)	556	92	61.04	+	1.51	0.000406	0.0184
suberin biosynthetic process (GO:0010345)	20	10	2.2	+	4.55	0.000413	0.0186
response to oxidative stress (GO:0006979)	417	73	45.78	+	1.59	0.00042	0.0187
syncytium formation (GO:0006949)	16	9	1.76	+	5.12	0.000419	0.0188
macromolecule glycosylation (GO:0043413)	105	1	11.53	-	0.09	0.000437	0.0191
cellular response to chemical stimulus (GO:0070887)	951	144	104.41	+	1.38	0.000442	0.0192
protein glycosylation (GO:0006486)	105	1	11.53	-	0.09	0.000437	0.0193
response to nematode (GO:0009624)	76	21	8.34	+	2.52	0.000489	0.0211
cellular response to oxidative stress (GO:0034599)	86	23	9.44	+	2.44	0.000514	0.022
cellular response to drug (GO:0035690)	87	23	9.55	+	2.41	0.000554	0.0236
anatomical structure formation involved in morphogenesis (GO:0048646)	193	40	21.19	+	1.89	0.000558	0.0236
positive regulation of biosynthetic process (GO:0009891)	569	93	62.47	+	1.49	0.000591	0.0246
positive regulation of macromolecule biosynthetic process (GO:0010557)	524	87	57.53	+	1.51	0.000588	0.0247
response to toxic substance (GO:0009636)	208	42	22.84	+	1.84	0.000607	0.0251
response to auxin (GO:0009733)	386	68	42.38	+	1.6	0.000614	0.0252
positive regulation of RNA metabolic process (GO:0051254)	506	84	55.55	+	1.51	0.000629	0.0256
cellular response to reactive oxygen species (GO:0034614)	46	15	5.05	+	2.97	0.000707	0.0286
response to reactive oxygen species (GO:0000302)	176	37	19.32	+	1.91	0.000727	0.029
cellular response to ethylene stimulus (GO:0071369)	108	26	11.86	+	2.19	0.000724	0.0291
response to external stimulus (GO:0009605)	1390	197	152.6	+	1.29	0.000752	0.0298
cutin biosynthetic process (GO:0010143)	18	9	1.98	+	4.55	0.000801	0.0316
regulation of amino acid transmembrane transport (GO:1903789)	7	6	0.77	+	7.81	0.000865	0.033
regulation of amino acid export (GO:0080143)	7	6	0.77	+	7.81	0.000865	0.0332
regulation of amine transport (GO:0051952)	7	6	0.77	+	7.81	0.000865	0.0334
regulation of amino acid transport (GO:0051955)	7	6	0.77	+	7.81	0.000865	0.0337
regulation of organic acid transport (GO:0032890)	7	6	0.77	+	7.81	0.000865	0.0339
ribosomal large subunit biogenesis (GO:0042273)	96	1	10.54	-	0.09	0.000919	0.0348
response to abscisic acid (GO:0009737)	551	89	60.49	+	1.47	0.00101	0.038
phenylpropanoid biosynthetic process (GO:0009699)	116	27	12.74	+	2.12	0.00102	0.0382
plant-type cell wall loosening (GO:0009828)	38	13	4.17	+	3.12	0.0011	0.0408
cellular polysaccharide metabolic process (GO:0044264)	234	10	25.69	-	0.39	0.00114	0.0421
mitotic cell cycle (GO:0000278)	220	9	24.15	-	0.37	0.00116	0.0426
secondary shoot formation (GO:0010223)	24	10	2.63	+	3.8	0.00125	0.0453
cellular amide metabolic process (GO:0043603)	756	54	83	-	0.65	0.00126	0.0453
shoot axis formation (GO:0010346)	24	10	2.63	+	3.8	0.00125	0.0455
response to alcohol (GO:0097305)	555	89	60.93	+	1.46	0.00131	0.0468
organelle localization (GO:0051640)	143	4	15.7	-	0.25	0.00131	0.047
endomembrane system organization (GO:0010256)	91	1	9.99	-	0.1	0.00133	0.047

## Sheet: rpt5a_3mMB_down
Analysis Type:	PANTHER Overrepresentation Test (Released 20181113)
Annotation Version and Release Date:	GO Ontology database Released 2018-12-01
Analyzed List:	upload_1 (Arabidopsis thaliana)
Reference List:	Arabidopsis thaliana (all genes in database)
Test Type:	FISHER
Correction:	FDR
GO biological process complete	Arabidopsis thaliana - REFLIST (27581)	upload_1 (3040)	upload_1 (expected)	upload_1 (over/under)	upload_1 (fold Enrichment)	upload_1 (raw P-value)	upload_1 (FDR)
cell wall organization or biogenesis (GO:0071554)	425	137	46.84	+	2.92	1.27e-23	7.49e-20
cell wall biogenesis (GO:0042546)	195	75	21.49	+	3.49	7.64e-17	2.26e-13
polysaccharide metabolic process (GO:0005976)	293	90	32.29	+	2.79	8.69e-15	1.71e-11
cellular process (GO:0009987)	10241	1343	1128.77	+	1.19	4.84e-14	7.16e-11
carbohydrate metabolic process (GO:0005975)	806	171	88.84	+	1.92	1.72e-13	2.03e-10
plant-type cell wall organization or biogenesis (GO:0071669)	225	73	24.8	+	2.94	2.55e-13	2.15e-10
polysaccharide biosynthetic process (GO:0000271)	175	63	19.29	+	3.27	2.45e-13	2.41e-10
carbohydrate biosynthetic process (GO:0016051)	313	89	34.5	+	2.58	3.92e-13	2.89e-10
cellular polysaccharide metabolic process (GO:0044264)	234	74	25.79	+	2.87	4.57e-13	3e-10
peptide biosynthetic process (GO:0043043)	559	14	61.61	-	0.23	2.22e-12	1.1e-09
plant-type cell wall biogenesis (GO:0009832)	142	54	15.65	+	3.45	2.21e-12	1.19e-09
cell wall organization (GO:0071555)	258	77	28.44	+	2.71	2.07e-12	1.22e-09
translation (GO:0006412)	554	14	61.06	-	0.23	4.55e-12	2.07e-09
cell wall macromolecule metabolic process (GO:0044036)	141	52	15.54	+	3.35	1.41e-11	5.94e-09
cellular carbohydrate metabolic process (GO:0044262)	339	89	37.36	+	2.38	1.55e-11	6.09e-09
cellular polysaccharide biosynthetic process (GO:0033692)	162	56	17.86	+	3.14	1.86e-11	6.87e-09
external encapsulating structure organization (GO:0045229)	294	81	32.4	+	2.5	2.23e-11	7.75e-09
gene expression (GO:0010467)	1512	90	166.65	-	0.54	2.37e-10	7.78e-08
cell wall polysaccharide metabolic process (GO:0010383)	113	43	12.45	+	3.45	3.63e-10	1.13e-07
lipid metabolic process (GO:0006629)	822	159	90.6	+	1.75	4.68e-10	1.32e-07
cellular carbohydrate biosynthetic process (GO:0034637)	206	61	22.71	+	2.69	4.52e-10	1.34e-07
lipid biosynthetic process (GO:0008610)	487	108	53.68	+	2.01	6.72e-10	1.8e-07
cellular glucan metabolic process (GO:0006073)	163	52	17.97	+	2.89	1.15e-09	2.95e-07
metabolic process (GO:0008152)	8200	1066	903.81	+	1.18	2.02e-09	4.98e-07
amide biosynthetic process (GO:0043604)	617	24	68.01	-	0.35	4.39e-09	1.04e-06
glucan metabolic process (GO:0044042)	171	52	18.85	+	2.76	5.62e-09	1.28e-06
hemicellulose metabolic process (GO:0010410)	75	32	8.27	+	3.87	7.17e-09	1.57e-06
plant-type secondary cell wall biogenesis (GO:0009834)	59	28	6.5	+	4.31	1.02e-08	2.16e-06
cell wall macromolecule biosynthetic process (GO:0044038)	82	33	9.04	+	3.65	1.31e-08	2.59e-06
cellular component macromolecule biosynthetic process (GO:0070589)	82	33	9.04	+	3.65	1.31e-08	2.68e-06
root system development (GO:0022622)	468	99	51.58	+	1.92	2.41e-08	4.6e-06
peptide metabolic process (GO:0006518)	635	27	69.99	-	0.39	2.51e-08	4.64e-06
root development (GO:0048364)	466	98	51.36	+	1.91	4.71e-08	8.44e-06
ribosome biogenesis (GO:0042254)	383	11	42.21	-	0.26	6.07e-08	1.05e-05
sterol metabolic process (GO:0016125)	77	30	8.49	+	3.53	1.05e-07	1.77e-05
steroid metabolic process (GO:0008202)	104	35	11.46	+	3.05	1.78e-07	2.85e-05
glucan biosynthetic process (GO:0009250)	109	36	12.01	+	3	1.75e-07	2.88e-05
cellular developmental process (GO:0048869)	865	153	95.34	+	1.6	2.01e-07	3.12e-05
cell differentiation (GO:0030154)	656	123	72.3	+	1.7	2.11e-07	3.2e-05
organic substance metabolic process (GO:0071704)	7379	948	813.32	+	1.17	2.8e-07	4.14e-05
cell wall polysaccharide biosynthetic process (GO:0070592)	77	29	8.49	+	3.42	3.01e-07	4.34e-05
isoprenoid metabolic process (GO:0006720)	190	50	20.94	+	2.39	3.76e-07	5.29e-05
cell development (GO:0048468)	299	68	32.96	+	2.06	4.1e-07	5.64e-05
steroid biosynthetic process (GO:0006694)	65	26	7.16	+	3.63	4.84e-07	6.5e-05
ribonucleoprotein complex biogenesis (GO:0022613)	466	19	51.36	-	0.37	1.11e-06	0.000142
biosynthetic process (GO:0009058)	2808	399	309.5	+	1.29	1.08e-06	0.000143
plant epidermis development (GO:0090558)	249	58	27.44	+	2.11	1.78e-06	0.000224
oxidation-reduction process (GO:0055114)	935	157	103.06	+	1.52	1.96e-06	0.000241
organic substance biosynthetic process (GO:1901576)	2689	382	296.38	+	1.29	2.06e-06	0.000249
cellular lipid metabolic process (GO:0044255)	668	120	73.63	+	1.63	2.2e-06	0.00025
cell cycle (GO:0007049)	486	94	53.57	+	1.75	2.19e-06	0.000254
movement of cell or subcellular component (GO:0006928)	97	31	10.69	+	2.9	2.15e-06	0.000254
xylan metabolic process (GO:0045491)	49	21	5.4	+	3.89	2.51e-06	0.00028
organic hydroxy compound biosynthetic process (GO:1901617)	180	46	19.84	+	2.32	2.86e-06	0.000313
localization (GO:0051179)	2378	342	262.11	+	1.3	2.92e-06	0.000314
fluid transport (GO:0042044)	29	16	3.2	+	5.01	3.33e-06	0.000345
organic hydroxy compound metabolic process (GO:1901615)	287	63	31.63	+	1.99	3.43e-06	0.000349
water transport (GO:0006833)	29	16	3.2	+	5.01	3.33e-06	0.000351
primary metabolic process (GO:0044238)	6666	852	734.73	+	1.16	3.82e-06	0.000383
triterpenoid metabolic process (GO:0006722)	22	14	2.42	+	5.77	4.01e-06	0.000395
cellular component organization or biogenesis (GO:0071840)	2830	396	311.92	+	1.27	4.62e-06	0.000448
root epidermal cell differentiation (GO:0010053)	128	36	14.11	+	2.55	4.7e-06	0.000448
xylan biosynthetic process (GO:0045492)	35	17	3.86	+	4.41	6.17e-06	0.000579
cell growth (GO:0016049)	357	73	39.35	+	1.86	6.4e-06	0.000591
plant epidermal cell differentiation (GO:0090627)	158	41	17.41	+	2.35	6.65e-06	0.000605
establishment of localization (GO:0051234)	2234	321	246.23	+	1.3	6.82e-06	0.000611
terpenoid metabolic process (GO:0006721)	143	38	15.76	+	2.41	8.03e-06	0.000698
cellular component organization (GO:0016043)	2472	350	272.47	+	1.28	7.96e-06	0.000702
nucleotide-sugar metabolic process (GO:0009225)	54	21	5.95	+	3.53	8.4e-06	0.00071
mitotic cell cycle (GO:0000278)	220	51	24.25	+	2.1	8.29e-06	0.000711
isoprenoid biosynthetic process (GO:0008299)	162	41	17.86	+	2.3	9.4e-06	0.000783
ncRNA metabolic process (GO:0034660)	400	17	44.09	-	0.39	1.07e-05	0.000879
actin filament-based movement (GO:0030048)	21	13	2.31	+	5.62	1.1e-05	0.000894
trichoblast differentiation (GO:0010054)	112	32	12.34	+	2.59	1.51e-05	0.00121
modification-dependent protein catabolic process (GO:0019941)	462	22	50.92	-	0.43	1.57e-05	0.00124
modification-dependent macromolecule catabolic process (GO:0043632)	472	23	52.02	-	0.44	1.95e-05	0.00148
cellulose metabolic process (GO:0030243)	53	20	5.84	+	3.42	1.95e-05	0.00149
ncRNA processing (GO:0034470)	323	12	35.6	-	0.34	1.92e-05	0.00149
response to stimulus (GO:0050896)	5704	731	628.7	+	1.16	2.16e-05	0.00162
xyloglucan metabolic process (GO:0010411)	31	15	3.42	+	4.39	2.23e-05	0.00165
cell cycle process (GO:0022402)	356	70	39.24	+	1.78	2.71e-05	0.00198
transport (GO:0006810)	2190	310	241.38	+	1.28	2.76e-05	0.00199
developmental process (GO:0032502)	3116	423	343.45	+	1.23	2.82e-05	0.00201
beta-glucan metabolic process (GO:0051273)	65	22	7.16	+	3.07	3.02e-05	0.0021
anatomical structure morphogenesis (GO:0009653)	852	139	93.91	+	1.48	3.01e-05	0.00212
microtubule-based process (GO:0007017)	188	44	20.72	+	2.12	3.36e-05	0.00231
ubiquitin-dependent protein catabolic process (GO:0006511)	449	22	49.49	-	0.44	3.46e-05	0.00235
plant organ development (GO:0099402)	940	150	103.61	+	1.45	3.55e-05	0.00239
trichoblast maturation (GO:0048764)	108	30	11.9	+	2.52	3.87e-05	0.00254
root hair cell differentiation (GO:0048765)	108	30	11.9	+	2.52	3.87e-05	0.00257
cellulose biosynthetic process (GO:0030244)	47	18	5.18	+	3.47	4.27e-05	0.00275
cell maturation (GO:0048469)	109	30	12.01	+	2.5	4.26e-05	0.00276
anion transport (GO:0006820)	295	60	32.52	+	1.85	4.93e-05	0.00313
nucleotide-sugar biosynthetic process (GO:0009226)	34	15	3.75	+	4	5.14e-05	0.00324
developmental maturation (GO:0021700)	188	43	20.72	+	2.08	5.44e-05	0.00339
cellular metabolic process (GO:0044237)	7115	888	784.22	+	1.13	5.71e-05	0.00351
plant-type cell wall organization (GO:0009664)	112	30	12.34	+	2.43	5.89e-05	0.00359
beta-glucan biosynthetic process (GO:0051274)	59	20	6.5	+	3.08	6.7e-05	0.00404
anatomical structure maturation (GO:0071695)	169	39	18.63	+	2.09	9.81e-05	0.00586
root morphogenesis (GO:0010015)	252	52	27.78	+	1.87	9.92e-05	0.00587
cytoskeleton-dependent cytokinesis (GO:0061640)	57	19	6.28	+	3.02	0.000121	0.00702
growth (GO:0040007)	411	75	45.3	+	1.66	0.000121	0.00705
cell morphogenesis (GO:0000902)	363	68	40.01	+	1.7	0.000125	0.00717
Golgi vesicle transport (GO:0048193)	179	40	19.73	+	2.03	0.000149	0.00849
triterpenoid biosynthetic process (GO:0016104)	17	10	1.87	+	5.34	0.000158	0.00888
system development (GO:0048731)	1818	257	200.38	+	1.28	0.000164	0.00899
sterol biosynthetic process (GO:0016126)	34	14	3.75	+	3.74	0.000162	0.00904
tissue development (GO:0009888)	564	96	62.16	+	1.54	0.000164	0.00907
transmembrane transport (GO:0055085)	702	114	77.38	+	1.47	0.000179	0.00969
anatomical structure development (GO:0048856)	2934	392	323.39	+	1.21	0.000201	0.0107
organic cyclic compound biosynthetic process (GO:1901362)	917	142	101.07	+	1.4	0.0002	0.0108
plant-type primary cell wall biogenesis (GO:0009833)	26	12	2.87	+	4.19	0.000206	0.0109
terpenoid biosynthetic process (GO:0016114)	116	29	12.79	+	2.27	0.00023	0.012
cellular protein metabolic process (GO:0044267)	2854	251	314.57	-	0.8	0.000238	0.0123
organic cyclic compound metabolic process (GO:1901360)	2691	362	296.6	+	1.22	0.000242	0.0123
cellular component morphogenesis (GO:0032989)	399	72	43.98	+	1.64	0.00024	0.0124
meiotic chromosome segregation (GO:0045132)	56	18	6.17	+	2.92	0.000262	0.0132
proteasome-mediated ubiquitin-dependent protein catabolic process (GO:0043161)	196	6	21.6	-	0.28	0.000325	0.0163
cellular amide metabolic process (GO:0043603)	756	51	83.33	-	0.61	0.000329	0.0163
mitotic cytokinesis (GO:0000281)	42	15	4.63	+	3.24	0.000336	0.0165
cytokinesis (GO:0000910)	97	25	10.69	+	2.34	0.000392	0.0192
developmental growth involved in morphogenesis (GO:0060560)	319	59	35.16	+	1.68	0.000493	0.0239
cell junction assembly (GO:0034329)	6	6	0.66	+	9.07	0.000518	0.0249
regulation of biological quality (GO:0065008)	1134	167	124.99	+	1.34	0.000531	0.0253
pectin metabolic process (GO:0045488)	63	19	6.94	+	2.74	0.000536	0.0254
galacturonan metabolic process (GO:0010393)	64	19	7.05	+	2.69	0.00058	0.027
brassinosteroid homeostasis (GO:0010268)	30	12	3.31	+	3.63	0.000578	0.0271
root hair cell development (GO:0080147)	88	23	9.7	+	2.37	0.000622	0.0287
proteasomal protein catabolic process (GO:0010498)	212	8	23.37	-	0.34	0.000637	0.0292
lipid homeostasis (GO:0055088)	56	17	6.17	+	2.75	0.000659	0.03
protein dephosphorylation (GO:0006470)	75	0	8.27	-	< 0.01	0.000702	0.0314
cellular protein catabolic process (GO:0044257)	564	36	62.16	-	0.58	0.000701	0.0316
drug catabolic process (GO:0042737)	129	30	14.22	+	2.11	0.000717	0.0319
pentacyclic triterpenoid metabolic process (GO:0019742)	10	7	1.1	+	6.35	0.000747	0.0327
pentacyclic triterpenoid biosynthetic process (GO:0019745)	10	7	1.1	+	6.35	0.000747	0.0329
cell morphogenesis involved in differentiation (GO:0000904)	216	43	23.81	+	1.81	0.000763	0.0332
response to extracellular stimulus (GO:0009991)	262	50	28.88	+	1.73	0.000784	0.0338
small molecule biosynthetic process (GO:0044283)	670	106	73.85	+	1.44	0.000794	0.034
cellular nitrogen compound biosynthetic process (GO:0044271)	1263	100	139.21	-	0.72	0.000833	0.0354
plant organ morphogenesis (GO:1905392)	385	67	42.44	+	1.58	0.000842	0.0355
pollen-pistil interaction (GO:0009875)	47	15	5.18	+	2.9	0.00088	0.0369
inorganic anion transport (GO:0015698)	103	25	11.35	+	2.2	0.000915	0.0381
post-Golgi vesicle-mediated transport (GO:0006892)	37	13	4.08	+	3.19	0.000929	0.0381
ribosomal large subunit biogenesis (GO:0042273)	96	1	10.58	-	0.09	0.000925	0.0382
nuclear chromosome segregation (GO:0098813)	96	24	10.58	+	2.27	0.00101	0.041
cell communication (GO:0007154)	1627	226	179.33	+	1.26	0.00101	0.041
vesicle budding from membrane (GO:0006900)	48	15	5.29	+	2.84	0.00105	0.0422
proteolysis involved in cellular protein catabolic process (GO:0051603)	555	36	61.17	-	0.59	0.00106	0.0422
receptor-mediated endocytosis (GO:0006898)	38	13	4.19	+	3.1	0.00113	0.045
acetyl-CoA metabolic process (GO:0006084)	15	8	1.65	+	4.84	0.00117	0.046
DNA-dependent DNA replication (GO:0006261)	109	26	12.01	+	2.16	0.00122	0.0473
RNA processing (GO:0006396)	723	51	79.69	-	0.64	0.00121	0.0475
response to nutrient levels (GO:0031667)	222	43	24.47	+	1.76	0.00127	0.0491
photosynthesis, light harvesting in photosystem I (GO:0009768)	24	10	2.65	+	3.78	0.00128	0.0492
mitotic cell cycle process (GO:1903047)	143	31	15.76	+	1.97	0.00129	0.0493
